# Supplementary material for: Angiotensin‐Converting Enzyme Inhibitors or Angiotensin Receptor Blockers Use and COVID‐19 Infection Among 824 650 Patients With Hypertension From a US Integrated Healthcare System
Source: PubMed Central journal article supplement — J Am Heart Assoc. 2021 Jan 19;10(3):e019669. doi: 10.1161/JAHA.120.019669 (PMC7955437; doi:10.1161/jaha.120.019669), 2021-01-19
Supplement: JAH3-10-e019669-s001.pdf [file JAH3-10-e019669-s001.pdf]

# **Supplemental Material**

**Table S1. Patient and Clinical Characteristics by Covid-19 Testing, and Test Results Among Patients with Hypertension\* (N=824,650).**

|                                                     | <b>Total<br/>(N=824,650)<br/>Row Percent=<br/>100%</b> | <b>Covid-19<br/>Testing, No<br/>(N=807,752)<br/><br/>98%</b> | <b>Covid-19<br/>Testing, Yes<br/>(N=16,898)<br/><br/>2.0%</b> | <b>Test Negative<br/>(N=15,104)<br/><br/>89.4%</b> | <b>Test<br/>Positive<br/>(N=1,794)<br/><br/>10.6%</b> |
|-----------------------------------------------------|--------------------------------------------------------|--------------------------------------------------------------|---------------------------------------------------------------|----------------------------------------------------|-------------------------------------------------------|
| Age in years                                        | 64.4 (13.56)                                           | 64.4 (13.54)                                                 | 64.3 (14.37)                                                  | 64.7 (14.44)                                       | 61.3 (13.42)                                          |
| 18-39                                               | 35067 (4.3%)                                           | 34294 (4.2%)                                                 | 773 (4.6%)                                                    | 683 (4.5%)                                         | 90 (5%)                                               |
| 40-64                                               | 363493 (44.1%)                                         | 355836 (44.1%)                                               | 7657 (45.3%)                                                  | 6635 (43.9%)                                       | 1022 (57%)                                            |
| 65-85                                               | 382794 (46.4%)                                         | 375537 (46.5%)                                               | 7257 (42.9%)                                                  | 6659 (44.1%)                                       | 598 (33.3%)                                           |
| 85+                                                 | 43296 (5.3%)                                           | 42085 (5.2%)                                                 | 1211 (7.2%)                                                   | 1127 (7.5%)                                        | 84 (4.7%)                                             |
| Men                                                 | 397941 (48.3%)                                         | 390351 (48.3%)                                               | 7590 (44.9%)                                                  | 6743 (44.6%)                                       | 847 (47.2%)                                           |
| Race/ethnicity                                      |                                                        |                                                              |                                                               |                                                    |                                                       |
| Asian                                               | 105040 (12.7%)                                         | 102725 (12.7%)                                               | 2315 (13.7%)                                                  | 1976 (13.1%)                                       | 339 (18.9%)                                           |
| Black                                               | 102667 (12.4%)                                         | 100230 (12.4%)                                               | 2437 (14.4%)                                                  | 2208 (14.6%)                                       | 229 (12.8%)                                           |
| Hispanic                                            | 270287 (32.8%)                                         | 264683 (32.8%)                                               | 5604 (33.2%)                                                  | 4743 (31.4%)                                       | 861 (48%)                                             |
| Other/Unknown                                       | 26053 (3.2%)                                           | 25679 (3.2%)                                                 | 374 (2.2%)                                                    | 343 (2.3%)                                         | 31 (1.7%)                                             |
| White                                               | 320603 (38.9%)                                         | 314435 (38.9%)                                               | 6168 (36.5%)                                                  | 5834 (38.6%)                                       | 334 (18.6%)                                           |
| Neighborhood Income                                 |                                                        |                                                              |                                                               |                                                    |                                                       |
| \$0-49k                                             | 152205 (18.5%)                                         | 148844 (18.4%)                                               | 3361 (19.9%)                                                  | 2847 (18.8%)                                       | 514 (28.7%)                                           |
| \$50-79k                                            | 308061 (37.4%)                                         | 301712 (37.4%)                                               | 6349 (37.6%)                                                  | 5670 (37.5%)                                       | 679 (37.8%)                                           |
| \$80-99k                                            | 165677 (20.1%)                                         | 162239 (20.1%)                                               | 3438 (20.3%)                                                  | 3106 (20.6%)                                       | 332 (18.5%)                                           |
| ≥\$100k                                             | 197393 (23.9%)                                         | 193661 (24%)                                                 | 3732 (22.1%)                                                  | 3467 (23%)                                         | 265 (14.8%)                                           |
| Missing                                             | 1314 (0.2%)                                            | 1296 (0.2%)                                                  | 18 (0.1%)                                                     | 14 (0.1%)                                          | 4 (0.2%)                                              |
| Neighborhood Education (% of ≥High School Graduate) |                                                        |                                                              |                                                               |                                                    |                                                       |
| 0-50%                                               | 25674 (3.1%)                                           | 25110 (3.1%)                                                 | 564 (3.3%)                                                    | 448 (3%)                                           | 116 (6.5%)                                            |
| 51-75%                                              | 202823 (24.6%)                                         | 198460 (24.6%)                                               | 4363 (25.8%)                                                  | 3726 (24.7%)                                       | 637 (35.5%)                                           |
| 76-100%                                             | 594879 (72.1%)                                         | 582925 (72.2%)                                               | 11954 (70.7%)                                                 | 10917 (72.3%)                                      | 1037 (57.8%)                                          |
| Insurance Type                                      |                                                        |                                                              |                                                               |                                                    |                                                       |
| Commercial                                          | 388737 (47.1%)                                         | 380548 (47.1%)                                               | 8189 (48.5%)                                                  | 7086 (46.9%)                                       | 1103 (61.5%)                                          |
| Private pay                                         | 281441 (34.1%)                                         | 276028 (34.2%)                                               | 5413 (32%)                                                    | 4928 (32.6%)                                       | 485 (27%)                                             |
| Medicare                                            | 131260 (15.9%)                                         | 128561 (15.9%)                                               | 2699 (16%)                                                    | 2556 (16.9%)                                       | 143 (8%)                                              |
| Medicaid                                            | 22935 (2.8%)                                           | 22340 (2.8%)                                                 | 595 (3.5%)                                                    | 532 (3.5%)                                         | 63 (3.5%)                                             |
| Other/Missing                                       | 277 (0.03%)                                            | 275 (0.03%)                                                  | 2 (0.01%)                                                     | 2 (0.01%)                                          | -                                                     |
| Body Mass Index (kg/m <sup>2</sup> )                | 30.8 (6.93)                                            | 30.8 (6.92)                                                  | 31.1 (7.53)                                                   | 31.0 (7.55)                                        | 32.0 (7.28)                                           |
| <25                                                 | 136795 (16.6%)                                         | 133638 (16.5%)                                               | 3157 (18.7%)                                                  | 2923 (19.4%)                                       | 234 (13%)                                             |
| 25-29.9                                             | 241392 (29.3%)                                         | 236532 (29.3%)                                               | 4860 (28.8%)                                                  | 4376 (29%)                                         | 484 (27%)                                             |
| 30-34.9                                             | 185222 (22.5%)                                         | 181220 (22.4%)                                               | 4002 (23.7%)                                                  | 3555 (23.5%)                                       | 447 (24.9%)                                           |
| 35-39.9                                             | 95157 (11.5%)                                          | 93011 (11.5%)                                                | 2146 (12.7%)                                                  | 1889 (12.5%)                                       | 257 (14.3%)                                           |
| ≥40                                                 | 69271 (8.4%)                                           | 67468 (8.4%)                                                 | 1803 (10.7%)                                                  | 1603 (10.6%)                                       | 200 (11.1%)                                           |
| Missing                                             | 96813 (11.7%)                                          | 95883 (11.9%)                                                | 930 (5.5%)                                                    | 758 (5%)                                           | 172 (9.6%)                                            |
| Smoking                                             |                                                        |                                                              |                                                               |                                                    |                                                       |
| Current                                             | 45961 (5.6%)                                           | 45006 (5.6%)                                                 | 955 (5.7%)                                                    | 906 (6%)                                           | 49 (2.7%)                                             |
| Former                                              | 255451 (31%)                                           | 249578 (30.9%)                                               | 5873 (34.8%)                                                  | 5384 (35.6%)                                       | 489 (27.3%)                                           |
| Never                                               | 521628 (63.3%)                                         | 511617 (63.3%)                                               | 10011 (59.2%)                                                 | 8764 (58%)                                         | 1247 (69.5%)                                          |
| Missing                                             | 1610 (0.2%)                                            | 1551 (0.2%)                                                  | 59 (0.3%)                                                     | 50 (0.3%)                                          | 9 (0.5%)                                              |
| Blood Pressure (BP) (mm Hg)                         |                                                        |                                                              |                                                               |                                                    |                                                       |
| Systolic BP (SBP)                                   | 129.4 (13.7)                                           | 129.4 (13.67)                                                | 128.6 (14.91)                                                 | 128.4 (14.96)                                      | 129.9 (14.33)                                         |

|                              | <b>Total<br/>(N=824,650)<br/>Row Percent=<br/>100%</b> | <b>Covid-19<br/>Testing, No<br/>(N=807,752)<br/><br/>98%</b> | <b>Covid-19<br/>Testing, Yes<br/>(N=16,898)<br/><br/>2.0%</b> | <b>Test Negative<br/>(N=15,104)<br/><br/>89.4%</b> | <b>Test<br/>Positive<br/>(N=1,794)<br/><br/>10.6%</b> |
|------------------------------|--------------------------------------------------------|--------------------------------------------------------------|---------------------------------------------------------------|----------------------------------------------------|-------------------------------------------------------|
| Diastolic BP (DBP)           | 72.6 (11.8)                                            | 72.6 (11.79)                                                 | 72.0 (12.53)                                                  | 71.8 (12.59)                                       | 73.3 (11.86)                                          |
| SBP/DBP<br><140/90           | 640878 (77.7%)                                         | 627469 (77.7%)                                               | 13409 (79.4%)                                                 | 12046 (79.8%)                                      | 1363 (76%)                                            |
| SBP/DBP<br><130/80           | 303924 (36.9%)                                         | 297026 (36.8%)                                               | 6898 (40.8%)                                                  | 6263 (41.5%)                                       | 635 (35.4%)                                           |
| Labs                         |                                                        |                                                              |                                                               |                                                    |                                                       |
| HbA1c (%)                    | 6.5 (1.37)                                             | 6.5 (1.36)                                                   | 6.6 (1.55)                                                    | 6.6 (1.52)                                         | 6.9 (1.74)                                            |
| Serum creatinine             | 0.9 (0.36)                                             | 0.9 (0.36)                                                   | 1.0 (0.48)                                                    | 1.0 (0.49)                                         | 0.9 (0.43)                                            |
| Total Cholesterol<br>(mg/dL) | 169.8 (43.22)                                          | 169.9 (43.16)                                                | 167.6 (45.88)                                                 | 167.2 (45.52)                                      | 171.3 (48.75)                                         |
| HDL-C (mg/dL)                | 50.1 (14.36)                                           | 50.1 (14.35)                                                 | 49.1 (14.98)                                                  | 49.2 (15.13)                                       | 47.6 (13.55)                                          |
| LDL-C (mg/dL)                | 95.0 (36.22)                                           | 95.0 (36.20)                                                 | 93.5 (37.09)                                                  | 93.1 (37.10)                                       | 96.7 (36.92)                                          |
| Triglycerides<br>(mg/dL)     | 139.0 (107.70)                                         | 138.9 (107.37)                                               | 144.7 (122.74)                                                | 143.8 (125.45)                                     | 151.7 (97.44)                                         |
| Pre-existing conditions      |                                                        |                                                              |                                                               |                                                    |                                                       |
| Elixhauser comorbidity score |                                                        |                                                              |                                                               |                                                    |                                                       |
| 0                            | 68139 (8.3%)                                           | 67371 (8.3%)                                                 | 768 (4.5%)                                                    | 624 (4.1%)                                         | 144 (8%)                                              |
| 1-3                          | 459962 (55.8%)                                         | 452970 (56.1%)                                               | 6992 (41.4%)                                                  | 6058 (40.1%)                                       | 934 (52.1%)                                           |
| 4+                           | 296549 (36%)                                           | 287411 (35.6%)                                               | 9138 (54.1%)                                                  | 8422 (55.8%)                                       | 716 (39.9%)                                           |
| Diabetes                     | 246744 (29.9%)                                         | 240318 (29.8%)                                               | 6426 (38%)                                                    | 5726 (37.9%)                                       | 700 (39%)                                             |
| Heart failure                | 22574 (2.7%)                                           | 21391 (2.6%)                                                 | 1183 (7%)                                                     | 1119 (7.4%)                                        | 64 (3.6%)                                             |
| CAD                          | 49481 (6%)                                             | 47608 (5.9%)                                                 | 1873 (11.1%)                                                  | 1758 (11.6%)                                       | 115 (6.4%)                                            |
| CKD                          | 52923 (6.4%)                                           | 51094 (6.3%)                                                 | 1829 (10.8%)                                                  | 1703 (11.3%)                                       | 126 (7%)                                              |
| Asthma                       | 71275 (8.6%)                                           | 68727 (8.5%)                                                 | 2548 (15.1%)                                                  | 2420 (16%)                                         | 128 (7.1%)                                            |
| COPD                         | 34268 (4.2%)                                           | 32707 (4%)                                                   | 1561 (9.2%)                                                   | 1506 (10%)                                         | 55 (3.1%)                                             |
| Pneumonia                    | 32988 (4%)                                             | 31373 (3.9%)                                                 | 1615 (9.6%)                                                   | 1505 (10%)                                         | 110 (6.1%)                                            |
| Lung disease                 | 6829 (0.8%)                                            | 6472 (0.8%)                                                  | 357 (2.1%)                                                    | 345 (2.3%)                                         | 12 (0.7%)                                             |
| Arrhythmia                   | 94680 (11.5%)                                          | 91422 (11.3%)                                                | 3258 (19.3%)                                                  | 3065 (20.3%)                                       | 193 (10.8%)                                           |
| Valvular Disease             | 28168 (3.4%)                                           | 26991 (3.3%)                                                 | 1177 (7%)                                                     | 1121 (7.4%)                                        | 56 (3.1%)                                             |
| Pulmonary                    | 13224 (1.6%)                                           | 12562 (1.6%)                                                 | 662 (3.9%)                                                    | 623 (4.1%)                                         | 39 (2.2%)                                             |
| Circulation Disease          |                                                        |                                                              |                                                               |                                                    |                                                       |
| PVD                          | 191739 (23.3%)                                         | 186096 (23%)                                                 | 5643 (33.4%)                                                  | 5259 (34.8%)                                       | 384 (21.4%)                                           |
| Cancer                       | 8892 (1.1%)                                            | 8520 (1.1%)                                                  | 372 (2.2%)                                                    | 353 (2.3%)                                         | 19 (1.1%)                                             |
| Paralysis                    | 6010 (0.7%)                                            | 5690 (0.7%)                                                  | 320 (1.9%)                                                    | 301 (2%)                                           | 19 (1.1%)                                             |
| Neurological                 | 31001 (3.8%)                                           | 29708 (3.7%)                                                 | 1293 (7.7%)                                                   | 1209 (8%)                                          | 84 (4.7%)                                             |
| Disorders                    |                                                        |                                                              |                                                               |                                                    |                                                       |
| Hypothyroidism               | 90429 (11%)                                            | 88188 (10.9%)                                                | 2241 (13.3%)                                                  | 2087 (13.8%)                                       | 154 (8.6%)                                            |
| Peptic Ulcer                 | 3572 (0.4%)                                            | 3388 (0.4%)                                                  | 184 (1.1%)                                                    | 174 (1.2%)                                         | 10 (0.6%)                                             |
| AIDS/HIV                     | 1444 (0.2%)                                            | 1384 (0.2%)                                                  | 60 (0.4%)                                                     | 56 (0.4%)                                          | 4 (0.2%)                                              |
| Lymphoma                     | 4572 (0.6%)                                            | 4379 (0.5%)                                                  | 193 (1.1%)                                                    | 182 (1.2%)                                         | 11 (0.6%)                                             |
| Solid Tumor                  | 35228 (4.3%)                                           | 34092 (4.2%)                                                 | 1136 (6.7%)                                                   | 1078 (7.1%)                                        | 58 (3.2%)                                             |
| Rheumatoid                   | 24733 (3%)                                             | 23816 (2.9%)                                                 | 917 (5.4%)                                                    | 855 (5.7%)                                         | 62 (3.5%)                                             |
| Arthritis                    |                                                        |                                                              |                                                               |                                                    |                                                       |
| Mild liver disease           | 43008 (5.2%)                                           | 41499 (5.1%)                                                 | 1509 (8.9%)                                                   | 1368 (9.1%)                                        | 141 (7.9%)                                            |
| Coagulopathy                 | 21749 (2.6%)                                           | 20795 (2.6%)                                                 | 954 (5.6%)                                                    | 905 (6%)                                           | 49 (2.7%)                                             |
| Electrolyte                  | 81218 (9.8%)                                           | 78096 (9.7%)                                                 | 3122 (18.5%)                                                  | 2916 (19.3%)                                       | 206 (11.5%)                                           |
| Disorders                    |                                                        |                                                              |                                                               |                                                    |                                                       |
| Anemia                       | 28019 (3.4%)                                           | 26797 (3.3%)                                                 | 1222 (7.2%)                                                   | 1133 (7.5%)                                        | 89 (5%)                                               |

|                                                                                    | <b>Total<br/>(N=824,650)<br/>Row Percent=<br/>100%</b> | <b>Covid-19<br/>Testing, No<br/>(N=807,752)<br/><br/>98%</b> | <b>Covid-19<br/>Testing, Yes<br/>(N=16,898)<br/><br/>2.0%</b> | <b>Test Negative<br/>(N=15,104)<br/><br/>89.4%</b> | <b>Test<br/>Positive<br/>(N=1,794)<br/><br/>10.6%</b> |
|------------------------------------------------------------------------------------|--------------------------------------------------------|--------------------------------------------------------------|---------------------------------------------------------------|----------------------------------------------------|-------------------------------------------------------|
| Alcohol Abuse                                                                      | 16412 (2%)                                             | 15747 (1.9%)                                                 | 665 (3.9%)                                                    | 625 (4.1%)                                         | 40 (2.2%)                                             |
| Drug Abuse                                                                         | 10213 (1.2%)                                           | 9684 (1.2%)                                                  | 529 (3.1%)                                                    | 504 (3.3%)                                         | 25 (1.4%)                                             |
| <b>Outpatient Antihypertensive Medication Use Prior to the Index Date</b>          |                                                        |                                                              |                                                               |                                                    |                                                       |
| ACEI                                                                               | 279380 (33.9%)                                         | 274502 (34.0%)                                               | 4878 (28.9%)                                                  | 4353 (28.8%)                                       | 525 (29.3%)                                           |
| ARB                                                                                | 159248 (19.3%)                                         | 155775 (19.3%)                                               | 3473 (20.6%)                                                  | 3116 (20.6%)                                       | 357 (19.9%)                                           |
| BB or CCB or<br>TD                                                                 | 184365 (22.4%)                                         | 180188 (22.3%)                                               | 4177 (24.7%)                                                  | 3835 (25.4%)                                       | 342 (19.1%)                                           |
| Other<br>Antihypertensives                                                         | 11457 (1.4%)                                           | 11080 (1.4%)                                                 | 377 (2.2%)                                                    | 355 (2.4%)                                         | 22 (1.2%)                                             |
| No<br>Antihypertensives                                                            | 190200 (23.1%)                                         | 186207 (23.1%)                                               | 3993 (23.6%)                                                  | 3445 (22.8%)                                       | 548 (30.5%)                                           |
| <b>Outpatient Medications Prior to the Index Date Other than Antihypertensives</b> |                                                        |                                                              |                                                               |                                                    |                                                       |
| Lipid lowering                                                                     | 486243 (59%)                                           | 476022 (58.9%)                                               | 10221 (60.5%)                                                 | 9198 (60.9%)                                       | 1023 (57%)                                            |
| Antiplatelets                                                                      | 66093 (8%)                                             | 64292 (8%)                                                   | 1801 (10.7%)                                                  | 1639 (10.9%)                                       | 162 (9%)                                              |
| Nitrates                                                                           | 28039 (3.4%)                                           | 26980 (3.3%)                                                 | 1059 (6.3%)                                                   | 999 (6.6%)                                         | 60 (3.3%)                                             |
| Antiarrhythmic<br>Agents                                                           | 7422 (0.9%)                                            | 7151 (0.9%)                                                  | 271 (1.6%)                                                    | 255 (1.7%)                                         | 16 (0.9%)                                             |
| Insulin                                                                            | 73776 (8.9%)                                           | 71346 (8.8%)                                                 | 2430 (14.4%)                                                  | 2183 (14.5%)                                       | 247 (13.8%)                                           |
| Oral<br>hypoglycemics                                                              | 202842 (24.6%)                                         | 198119 (24.5%)                                               | 4723 (28%)                                                    | 4146 (27.4%)                                       | 577 (32.2%)                                           |

Mean (SD) or N (%) are reported. Abbreviations: ACEI = angiotensin-converting enzyme inhibitors; ARB = angiotensin receptor blockers; BP = blood pressure; CCB = calcium channel blockers; BB = beta-blockers; CAD = coronary artery disease; CKD = chronic kidney disease; COPD = chronic obstructive pulmonary disease; DBP = diastolic blood pressure; HbA1c = hemoglobin A1c; HDL-C = high-density lipoprotein cholesterol; LDL-C = low-density lipoprotein cholesterol; PVD = peripheral vascular disease; SBP = systolic blood pressure; TD = thiazide diuretics. \*Patients with hypertension was identified from the Kaiser Permanente Southern California (KPSC) hypertension registry as of March 1<sup>st</sup>, 2020. The KPSC hypertension registry includes adult members having one of the following criteria: 1) hypertension diagnosis on the active problem list, 2)  $\geq 2$  outpatient visits with a diagnosis code of hypertension within 365 days of each other, 3)  $\geq 1$  outpatient visit and  $\geq 1$  hospital discharge with a diagnosis code of hypertension within 365 days of each other, 4)  $\geq 1$  antihypertensive medication dispensing in the past 6 months and  $\geq 1$  outpatient visit with a diagnosis code of hypertension within 365 days of the dispensing date, or 5)  $\geq 1$  outpatient visit with a diagnosis code of hypertension and having comorbidities of heart failure, diabetes, coronary artery disease, chronic kidney disease, or cerebrovascular accident.

**Table S2. Baseline Characteristics Before and After Matching (between ACEIs and CCB/BB/TD).**

|                                                | Before Matching  |                      | After Matching   |                      |
|------------------------------------------------|------------------|----------------------|------------------|----------------------|
|                                                | ACEIs<br>N=4,875 | CCB/BB/TD<br>N=4,170 | ACEIs<br>N=3,598 | CCB/BB/TD<br>N=3,598 |
| Age in years                                   |                  |                      |                  |                      |
| 18-39                                          | 159 (3.3%)       | 195 (4.7%)           | 126 (3.5%)       | 136 (3.8%)           |
| 40-64                                          | 2271 (46.6%)     | 1794 (43%)           | 1502 (41.7%)     | 1592 (44.2%)         |
| 65-85                                          | 2161 (44.3%)     | 1840 (44.1%)         | 1703 (47.3%)     | 1609 (44.7%)         |
| 85+                                            | 284 (5.8%)       | 341 (8.2%)           | 267 (7.4%)       | 261 (7.3%)           |
| Women                                          | 2302 (47.2%)     | 2557 (61.3%)         | 1935 (53.8%)     | 2050 (57%)           |
| Race/Ethnicity                                 |                  |                      |                  |                      |
| White                                          | 1896 (38.9%)     | 1621 (38.9%)         | 1485 (41.3%)     | 1421 (39.5%)         |
| Asian                                          | 528 (10.8%)      | 565 (13.5%)          | 421 (11.7%)      | 457 (12.7%)          |
| Black                                          | 603 (12.4%)      | 758 (18.2%)          | 559 (15.5%)      | 555 (15.4%)          |
| Hispanic                                       | 1743 (35.8%)     | 1136 (27.2%)         | 1068 (29.7%)     | 1086 (30.2%)         |
| Other/Unknown                                  | 105 (2.2%)       | 90 (2.2%)            | 65 (1.8%)        | 79 (2.2%)            |
| BMI category                                   |                  |                      |                  |                      |
| <25                                            | 782 (16%)        | 887 (21.3%)          | 666 (18.5%)      | 699 (19.4%)          |
| 25-29.9                                        | 1403 (28.8%)     | 1270 (30.5%)         | 1102 (30.6%)     | 1101 (30.6%)         |
| 30-34.9                                        | 1242 (25.5%)     | 921 (22.1%)          | 861 (23.9%)      | 822 (22.8%)          |
| 35-39.9                                        | 645 (13.2%)      | 535 (12.8%)          | 472 (13.1%)      | 464 (12.9%)          |
| ≥40                                            | 554 (11.4%)      | 402 (9.6%)           | 356 (9.9%)       | 362 (10.1%)          |
| Missing                                        | 249 (5.1%)       | 155 (3.7%)           | 141 (3.9%)       | 150 (4.2%)           |
| Smoking status                                 |                  |                      |                  |                      |
| Never                                          | 2791 (57.3%)     | 2472 (59.3%)         | 2114 (58.8%)     | 2121 (58.9%)         |
| Current                                        | 345 (7.1%)       | 211 (5.1%)           | 197 (5.5%)       | 203 (5.6%)           |
| Former                                         | 1731 (35.5%)     | 1476 (35.4%)         | 1279 (35.5%)     | 1265 (35.2%)         |
| Missing                                        | 8 (0.2%)         | 11 (0.3%)            | 8 (0.2%)         | 9 (0.3%)             |
| Medicaid indicator                             | 383 (7.9%)       | 342 (8.2%)           | 260 (7.2%)       | 291 (8.1%)           |
| Household income                               |                  |                      |                  |                      |
| \$0-49k                                        | 976 (20%)        | 753 (18.1%)          | 643 (17.9%)      | 666 (18.5%)          |
| \$50-79k                                       | 1861 (38.2%)     | 1530 (36.7%)         | 1340 (37.2%)     | 1330 (37%)           |
| \$80-99k                                       | 984 (20.2%)      | 856 (20.5%)          | 751 (20.9%)      | 737 (20.5%)          |
| ≥\$100k                                        | 1054 (21.6%)     | 1031 (24.7%)         | 864 (24%)        | 865 (24%)            |
| Neighborhood education                         |                  |                      |                  |                      |
| <75%                                           | 1487 (30.5%)     | 1097 (26.3%)         | 962 (26.7%)      | 985 (27.4%)          |
| 76-100%                                        | 3388 (69.5%)     | 3073 (73.7%)         | 2636 (73.3%)     | 2613 (72.6%)         |
| Elixhauser score                               |                  |                      |                  |                      |
| 0                                              | 127 (2.6%)       | 112 (2.7%)           | 99 (2.8%)        | 98 (2.7%)            |
| 1-3                                            | 2079 (42.6%)     | 1744 (41.8%)         | 1546 (43%)       | 1515 (42.1%)         |
| 4+                                             | 2669 (54.7%)     | 2314 (55.5%)         | 1953 (54.3%)     | 1985 (55.2%)         |
| Pre-existing comorbidities                     |                  |                      |                  |                      |
| Pneumonia                                      | 393 (8.1%)       | 456 (10.9%)          | 331 (9.2%)       | 337 (9.4%)           |
| Lung disease                                   | 82 (1.7%)        | 105 (2.5%)           | 71 (2%)          | 75 (2.1%)            |
| Diabetes                                       | 2231 (45.8%)     | 1206 (28.9%)         | 1280 (35.6%)     | 1162 (32.3%)         |
| Heart Failure                                  | 328 (6.7%)       | 395 (9.5%)           | 292 (8.1%)       | 298 (8.3%)           |
| Asthma                                         | 618 (12.7%)      | 719 (17.2%)          | 541 (15%)        | 545 (15.1%)          |
| COPD                                           | 378 (7.8%)       | 476 (11.4%)          | 348 (9.7%)       | 361 (10%)            |
| Cancer                                         | 342 (7%)         | 333 (8%)             | 274 (7.6%)       | 278 (7.7%)           |
| Outpatient Medications Prior to the Index Date |                  |                      |                  |                      |
| Antiarrhythmic Agents                          | 73 (1.5%)        | 112 (2.7%)           | 70 (1.9%)        | 71 (2%)              |
| Antiplatelets                                  | 568 (11.7%)      | 479 (11.5%)          | 412 (11.5%)      | 408 (11.3%)          |
| Insulin                                        | 892 (18.3%)      | 450 (10.8%)          | 491 (13.6%)      | 436 (12.1%)          |
| Lipid lowering agents                          | 3414 (70%)       | 2454 (58.8%)         | 2328 (64.7%)     | 2241 (62.3%)         |
| Nitrates                                       | 318 (6.5%)       | 322 (7.7%)           | 280 (7.8%)       | 265 (7.4%)           |
| Oral hypoglycemics                             | 1805 (37%)       | 821 (19.7%)          | 887 (24.7%)      | 813 (22.6%)          |

|                           |                |                |               |                |
|---------------------------|----------------|----------------|---------------|----------------|
| SBP/DBP <140/90 mm Hg     | 4004 (82.1%)   | 3419 (82%)     | 2952 (82%)    | 2941 (81.7%)   |
| SBP/DBP <130/80 mm Hg     | 2130 (43.7%)   | 1775 (42.6%)   | 1586 (44.1%)  | 1540 (42.8%)   |
| Labs                      |                |                |               |                |
| Serum creatinine          | 1.0 (0.39)     | 1.0 (0.56)     | 1.0 (0.41)    | 1.0 (0.57)     |
| HDL-C (mg/dL)             | 47.9 (13.97)   | 50.2 (16.14)   | 49.4 (14.36)  | 49.5 (15.57)   |
| HbA1c (%)                 | 6.8 (1.62)     | 6.3 (1.35)     | 6.5 (1.44)    | 6.4 (1.39)     |
| LDL-C (mg/dL)             | 90.8 (36.39)   | 94.7 (37.33)   | 92.5 (35.71)  | 93.9 (37.31)   |
| Total Cholesterol (mg/dL) | 164.0 (45.91)  | 169.6 (46.74)  | 166.2 (43.50) | 168.4 (46.64)  |
| Triglycerides (mg/dL)     | 146.1 (107.58) | 138.7 (107.34) | 136.9 (81.82) | 141.1 (111.73) |

Mean (SD) or N (%) are reported. Abbreviations: ACEI = angiotensin-converting enzyme inhibitors; ARB = angiotensin receptor blockers; BP = blood pressure; CCB = calcium channel blockers; BB = beta-blockers; CAD = coronary artery disease; CKD = chronic kidney disease; COPD = chronic obstructive pulmonary disease; DBP = diastolic blood pressure; HbA1c = hemoglobin A1c; HDL-C = high-density lipoprotein cholesterol; LDL-C = low-density lipoprotein cholesterol; PVD = peripheral vascular disease; SBP = systolic blood pressure; TD = thiazide diuretics.

**Table S3. Baseline Characteristics Before and After Matching (between ARBs and CCB/BBTD).**

|                                                | Before Matching |                      | After Matching |                      |
|------------------------------------------------|-----------------|----------------------|----------------|----------------------|
|                                                | ARB<br>N=3,468  | CCB/BB/TD<br>N=4,170 | ARB<br>N=2,945 | CCB/BB/TD<br>N=2,945 |
| Age in years                                   |                 |                      |                |                      |
| 18-39                                          | 76 (2.2%)       | 195 (4.7%)           | 73 (2.5%)      | 77 (2.6%)            |
| 40-64                                          | 1445 (41.7%)    | 1794 (43%)           | 1199 (40.7%)   | 1277 (43.4%)         |
| 65-85                                          | 1721 (49.6%)    | 1840 (44.1%)         | 1456 (49.4%)   | 1378 (46.8%)         |
| 85+                                            | 226 (6.5%)      | 341 (8.2%)           | 217 (7.4%)     | 213 (7.2%)           |
| Women                                          | 2065 (59.5%)    | 2557 (61.3%)         | 1766 (60%)     | 1763 (59.9%)         |
| Race/Ethnicity                                 |                 |                      |                |                      |
| White                                          | 1149 (33.1%)    | 1621 (38.9%)         | 1072 (36.4%)   | 1064 (36.1%)         |
| Asian                                          | 698 (20.1%)     | 565 (13.5%)          | 477 (16.2%)    | 504 (17.1%)          |
| Black                                          | 469 (13.5%)     | 758 (18.2%)          | 456 (15.5%)    | 442 (15%)            |
| Hispanic                                       | 1068 (30.8%)    | 1136 (27.2%)         | 877 (29.8%)    | 862 (29.3%)          |
| Other/Unknown                                  | 84 (2.4%)       | 90 (2.2%)            | 63 (2.1%)      | 73 (2.5%)            |
| BMI category                                   |                 |                      |                |                      |
| <25                                            | 554 (16%)       | 887 (21.3%)          | 518 (17.6%)    | 510 (17.3%)          |
| 25-29.9                                        | 990 (28.5%)     | 1270 (30.5%)         | 872 (29.6%)    | 887 (30.1%)          |
| 30-34.9                                        | 925 (26.7%)     | 921 (22.1%)          | 721 (24.5%)    | 727 (24.7%)          |
| 35-39.9                                        | 487 (14%)       | 535 (12.8%)          | 409 (13.9%)    | 410 (13.9%)          |
| ≥40                                            | 392 (11.3%)     | 402 (9.6%)           | 319 (10.8%)    | 306 (10.4%)          |
| Missing                                        | 120 (3.5%)      | 155 (3.7%)           | 106 (3.6%)     | 105 (3.6%)           |
| Smoking status                                 |                 |                      |                |                      |
| Never                                          | 2134 (61.5%)    | 2472 (59.3%)         | 1778 (60.4%)   | 1775 (60.3%)         |
| Current                                        | 132 (3.8%)      | 211 (5.1%)           | 120 (4.1%)     | 133 (4.5%)           |
| Former                                         | 1198 (34.5%)    | 1476 (35.4%)         | 1043 (35.4%)   | 1034 (35.1%)         |
| Missing                                        | 4 (0.1%)        | 11 (0.3%)            | 4 (0.1%)       | 3 (0.1%)             |
| Medicaid indicator                             | 294 (8.5%)      | 342 (8.2%)           | 223 (7.6%)     | 241 (8.2%)           |
| Household income                               |                 |                      |                |                      |
| \$0-49k                                        | 635 (18.3%)     | 753 (18.1%)          | 526 (17.9%)    | 538 (18.3%)          |
| \$50-79k                                       | 1281 (36.9%)    | 1530 (36.7%)         | 1079 (36.6%)   | 1073 (36.4%)         |
| \$80-99k                                       | 772 (22.3%)     | 856 (20.5%)          | 634 (21.5%)    | 641 (21.8%)          |
| ≥\$100k                                        | 780 (22.5%)     | 1031 (24.7%)         | 706 (24%)      | 693 (23.5%)          |
| Neighborhood education                         |                 |                      |                |                      |
| <75%                                           | 969 (27.9%)     | 1097 (26.3%)         | 777 (26.4%)    | 784 (26.6%)          |
| 76-100%                                        | 2499 (72.1%)    | 3073 (73.7%)         | 2168 (73.6%)   | 2161 (73.4%)         |
| Elixhauser score                               |                 |                      |                |                      |
| 0                                              | 57 (1.6%)       | 112 (2.7%)           | 56 (1.9%)      | 72 (2.4%)            |
| 1-3                                            | 1263 (36.4%)    | 1744 (41.8%)         | 1112 (37.8%)   | 1156 (39.3%)         |
| 4+                                             | 2148 (61.9%)    | 2314 (55.5%)         | 1777 (60.3%)   | 1717 (58.3%)         |
| Pre-existing comorbidities                     |                 |                      |                |                      |
| Pneumonia                                      | 340 (9.8%)      | 456 (10.9%)          | 299 (10.2%)    | 296 (10.1%)          |
| Lung disease                                   | 83 (2.4%)       | 105 (2.5%)           | 77 (2.6%)      | 77 (2.6%)            |
| Diabetes                                       | 1708 (49.3%)    | 1206 (28.9%)         | 1202 (40.8%)   | 1134 (38.5%)         |
| Heart Failure                                  | 281 (8.1%)      | 395 (9.5%)           | 264 (9%)       | 268 (9.1%)           |
| Asthma                                         | 620 (17.9%)     | 719 (17.2%)          | 531 (18%)      | 504 (17.1%)          |
| COPD                                           | 366 (10.6%)     | 476 (11.4%)          | 339 (11.5%)    | 326 (11.1%)          |
| Cancer                                         | 236 (6.8%)      | 333 (8%)             | 215 (7.3%)     | 217 (7.4%)           |
| Outpatient Medications Prior to the Index Date |                 |                      |                |                      |
| Antiarrhythmic Agents                          | 45 (1.3%)       | 112 (2.7%)           | 45 (1.5%)      | 49 (1.7%)            |
| Antiplatelets                                  | 470 (13.6%)     | 479 (11.5%)          | 384 (13%)      | 367 (12.5%)          |
| Insulin                                        | 643 (18.5%)     | 450 (10.8%)          | 456 (15.5%)    | 427 (14.5%)          |
| Lipid lowering agents                          | 2525 (72.8%)    | 2454 (58.8%)         | 2032 (69%)     | 1967 (66.8%)         |
| Nitrates                                       | 291 (8.4%)      | 322 (7.7%)           | 254 (8.6%)     | 244 (8.3%)           |
| Oral hypoglycemics                             | 1275 (36.8%)    | 821 (19.7%)          | 833 (28.3%)    | 790 (26.8%)          |

|                           |                |                |                |               |
|---------------------------|----------------|----------------|----------------|---------------|
| SBP/DBP <140/90 mm Hg     | 2767 (79.8%)   | 3419 (82%)     | 2359 (80.1%)   | 2385 (81%)    |
| SBP/DBP <130/80 mm Hg     | 1369 (39.5%)   | 1775 (42.6%)   | 1175 (39.9%)   | 1240 (42.1%)  |
| Labs                      |                |                |                |               |
| Serum creatinine          | 1.0 (0.51)     | 1.0 (0.56)     | 1.0 (0.43)     | 1.0 (0.60)    |
| HDL-C (mg/dL)             | 49.0 (14.52)   | 50.2 (16.14)   | 49.9 (14.96)   | 49.4 (15.60)  |
| HbA1c (%)                 | 6.7 (1.40)     | 6.3 (1.35)     | 6.6 (1.34)     | 6.5 (1.45)    |
| LDL-C (mg/dL)             | 89.1 (34.93)   | 94.7 (37.33)   | 90.7 (35.27)   | 92.8 (37.96)  |
| Total Cholesterol (mg/dL) | 163.7 (42.78)  | 169.6 (46.74)  | 165.2 (42.86)  | 167.3 (47.07) |
| Triglycerides (mg/dL)     | 151.1 (156.94) | 138.7 (107.34) | 145.2 (159.27) | 140.5 (94.59) |

Mean (SD) or N (%) are reported. ACEI = angiotensin-converting enzyme inhibitors; ARB = angiotensin receptor blockers; BP = blood pressure; CCB = calcium channel blockers; BB = beta-blockers; CAD = coronary artery disease; CKD = chronic kidney disease; COPD = chronic obstructive pulmonary disease; DBP = diastolic blood pressure; HbA1c = hemoglobin A1c; HDL-C = high-density lipoprotein cholesterol; LDL-C = low-density lipoprotein cholesterol; PVD = peripheral vascular disease; SBP = systolic blood pressure; TD = thiazide diuretics.



**Table S4. Baseline Characteristics Before and After Matching (between No Antihypertensive Medications and CCB/BB/TD).**

|                                                | Before Matching                            |                      | After Matching                             |                      |
|------------------------------------------------|--------------------------------------------|----------------------|--------------------------------------------|----------------------|
|                                                | No Antihypertensive Medications<br>N=3,990 | CCB/BB/TD<br>N=4,170 | No Antihypertensive Medications<br>N=3,110 | CCB/BB/TD<br>N=3,110 |
| Age in years                                   |                                            |                      |                                            |                      |
| 18-39                                          | 335 (8.4%)                                 | 195 (4.7%)           | 192 (6.2%)                                 | 143 (4.6%)           |
| 40-64                                          | 2031 (50.9%)                               | 1794 (43%)           | 1507 (48.5%)                               | 1531 (49.2%)         |
| 65-85                                          | 1321 (33.1%)                               | 1840 (44.1%)         | 1173 (37.7%)                               | 1176 (37.8%)         |
| 85+                                            | 303 (7.6%)                                 | 341 (8.2%)           | 238 (7.7%)                                 | 260 (8.4%)           |
| Women                                          | 2215 (55.5%)                               | 2557 (61.3%)         | 1879 (60.4%)                               | 1850 (59.5%)         |
| Race/Ethnicity                                 |                                            |                      |                                            |                      |
| White                                          | 1314 (32.9%)                               | 1621 (38.9%)         | 1125 (36.2%)                               | 1134 (36.5%)         |
| Asian                                          | 495 (12.4%)                                | 565 (13.5%)          | 415 (13.3%)                                | 387 (12.4%)          |
| Black                                          | 547 (13.7%)                                | 758 (18.2%)          | 487 (15.7%)                                | 503 (16.2%)          |
| Hispanic                                       | 1546 (38.7%)                               | 1136 (27.2%)         | 1010 (32.5%)                               | 1026 (33%)           |
| Other/Unknown                                  | 88 (2.2%)                                  | 90 (2.2%)            | 73 (2.3%)                                  | 60 (1.9%)            |
| BMI category                                   |                                            |                      |                                            |                      |
| <25                                            | 851 (21.3%)                                | 887 (21.3%)          | 688 (22.1%)                                | 700 (22.5%)          |
| 25-29.9                                        | 1070 (26.8%)                               | 1270 (30.5%)         | 909 (29.2%)                                | 886 (28.5%)          |
| 30-34.9                                        | 827 (20.7%)                                | 921 (22.1%)          | 666 (21.4%)                                | 666 (21.4%)          |
| 35-39.9                                        | 435 (10.9%)                                | 535 (12.8%)          | 385 (12.4%)                                | 371 (11.9%)          |
| ≥40                                            | 412 (10.3%)                                | 402 (9.6%)           | 308 (9.9%)                                 | 315 (10.1%)          |
| Missing                                        | 395 (9.9%)                                 | 155 (3.7%)           | 154 (5%)                                   | 172 (5.5%)           |
| Smoking status                                 |                                            |                      |                                            |                      |
| Never                                          | 2434 (61%)                                 | 2472 (59.3%)         | 1895 (60.9%)                               | 1889 (60.7%)         |
| Current                                        | 245 (6.1%)                                 | 211 (5.1%)           | 177 (5.7%)                                 | 175 (5.6%)           |
| Former                                         | 1275 (32%)                                 | 1476 (35.4%)         | 1027 (33%)                                 | 1030 (33.1%)         |
| Missing                                        | 36 (0.9%)                                  | 11 (0.3%)            | 11 (0.4%)                                  | 16 (0.5%)            |
| Medicaid indicator                             | 457 (11.5%)                                | 342 (8.2%)           | 296 (9.5%)                                 | 283 (9.1%)           |
| Household income                               |                                            |                      |                                            |                      |
| \$0-49k                                        | 922 (23.1%)                                | 753 (18.1%)          | 600 (19.3%)                                | 623 (20%)            |
| \$50-79k                                       | 1536 (38.5%)                               | 1530 (36.7%)         | 1195 (38.4%)                               | 1194 (38.4%)         |
| \$80-99k                                       | 749 (18.8%)                                | 856 (20.5%)          | 615 (19.8%)                                | 616 (19.8%)          |
| ≥\$100k                                        | 783 (19.6%)                                | 1031 (24.7%)         | 700 (22.5%)                                | 677 (21.8%)          |
| Neighborhood education                         |                                            |                      |                                            |                      |
| <75%                                           | 1266 (31.7%)                               | 1097 (26.3%)         | 885 (28.5%)                                | 894 (28.7%)          |
| 76-100%                                        | 2724 (68.3%)                               | 3073 (73.7%)         | 2225 (71.5%)                               | 2216 (71.3%)         |
| Elixhauser score                               |                                            |                      |                                            |                      |
| 0                                              | 455 (11.4%)                                | 112 (2.7%)           | 105 (3.4%)                                 | 251 (8.1%)           |
| 1-3                                            | 1820 (45.6%)                               | 1744 (41.8%)         | 1450 (46.6%)                               | 1400 (45%)           |
| 4+                                             | 1715 (43%)                                 | 2314 (55.5%)         | 1555 (50%)                                 | 1459 (46.9%)         |
| Pre-existing comorbidities                     |                                            |                      |                                            |                      |
| Pneumonia                                      | 356 (8.9%)                                 | 456 (10.9%)          | 294 (9.5%)                                 | 282 (9.1%)           |
| Lung disease                                   | 69 (1.7%)                                  | 105 (2.5%)           | 58 (1.9%)                                  | 59 (1.9%)            |
| Diabetes                                       | 1129 (28.3%)                               | 1206 (28.9%)         | 859 (27.6%)                                | 893 (28.7%)          |
| Heart Failure                                  | 105 (2.6%)                                 | 395 (9.5%)           | 114 (3.7%)                                 | 99 (3.2%)            |
| Asthma                                         | 511 (12.8%)                                | 719 (17.2%)          | 459 (14.8%)                                | 453 (14.6%)          |
| COPD                                           | 254 (6.4%)                                 | 476 (11.4%)          | 242 (7.8%)                                 | 238 (7.7%)           |
| Cancer                                         | 233 (5.8%)                                 | 333 (8%)             | 217 (7%)                                   | 213 (6.8%)           |
| Outpatient Medications Prior to the Index Date |                                            |                      |                                            |                      |
| Antiarrhythmic Agents                          | 26 (0.7%)                                  | 112 (2.7%)           | 30 (1%)                                    | 25 (0.8%)            |
| Antiplatelets                                  | 239 (6%)                                   | 479 (11.5%)          | 240 (7.7%)                                 | 227 (7.3%)           |
| Insulin                                        | 386 (9.7%)                                 | 450 (10.8%)          | 300 (9.6%)                                 | 322 (10.4%)          |
| Lipid lowering agents                          | 1577 (39.5%)                               | 2454 (58.8%)         | 1508 (48.5%)                               | 1460 (46.9%)         |

|                           |                |                |                |                |
|---------------------------|----------------|----------------|----------------|----------------|
| Nitrates                  | 88 (2.2%)      | 322 (7.7%)     | 98 (3.2%)      | 88 (2.8%)      |
| Oral hypoglycemics        | 739 (18.5%)    | 821 (19.7%)    | 592 (19%)      | 587 (18.9%)    |
| SBP/DBP <140/90 mm Hg     | 2881 (72.2%)   | 3419 (82%)     | 2459 (79.1%)   | 2404 (77.3%)   |
| SBP/DBP <130/80 mm Hg     | 1416 (35.5%)   | 1775 (42.6%)   | 1238 (39.8%)   | 1197 (38.5%)   |
| Labs                      |                |                |                |                |
| Serum creatinine          | 0.9 (0.44)     | 1.0 (0.56)     | 1.0 (0.55)     | 0.9 (0.43)     |
| HDL-C (mg/dL)             | 49.3 (15.18)   | 50.2 (16.14)   | 50.3 (16.23)   | 50.1 (15.42)   |
| HbA1c (%)                 | 6.6 (1.75)     | 6.3 (1.35)     | 6.3 (1.36)     | 6.6 (1.70)     |
| LDL-C (mg/dL)             | 101.5 (38.96)  | 94.7 (37.33)   | 97.9 (37.08)   | 101.0 (40.03)  |
| Total Cholesterol (mg/dL) | 175.7 (46.96)  | 169.6 (46.74)  | 173.1 (46.48)  | 175.3 (47.92)  |
| Triglycerides (mg/dL)     | 145.0 (122.04) | 138.7 (107.34) | 141.0 (114.92) | 140.3 (113.01) |

Mean (SD) or N (%) are reported. ACEI = angiotensin-converting enzyme inhibitors; ARB = angiotensin receptor blockers; BP = blood pressure; CCB = calcium channel blockers; BB = beta-blockers; CAD = coronary artery disease; CKD = chronic kidney disease; COPD = chronic obstructive pulmonary disease; DBP = diastolic blood pressure; HbA1c = hemoglobin A1c; HDL-C = high-density lipoprotein cholesterol; LDL-C = low-density lipoprotein cholesterol; PVD = peripheral vascular disease; SBP = systolic blood pressure; TD = thiazide diuretics.

**Table S5. Odds Ratio (95% CI) of Covid-19 Infection Associated with Antihypertensive Drug Exposure Among All Patients with Hypertension (Outcome = Covid-19 Infection; Reference group: CCB/BB/TD).**

|                                       | <b>Crude OR</b>     | <b>Age- and Sex-<br/>Adjusted OR</b> | <b>Multivariable<br/>Adjusted OR*</b> |
|---------------------------------------|---------------------|--------------------------------------|---------------------------------------|
| <b>ACEI</b>                           | 1.01<br>(0.88-1.16) | 0.98<br>(0.86-1.13)                  | 0.92<br>(0.80-1.06)                   |
| <b>ARB</b>                            | 1.20<br>(1.04-1.40) | 1.15<br>(0.99-1.33)                  | 1.04<br>(0.89-1.21)                   |
| <b>No Antihypertensive Medication</b> | 1.55<br>(1.36-1.78) | 1.38<br>(1.21-1.59)                  | 1.44<br>(1.25-1.65)                   |

ACEI = angiotensin-converting enzyme inhibitors; ARB = angiotensin receptor blockers; BB = beta blocker; CCB = calcium channel blocker; \*Patient demographics, neighborhood income and education, insurance, body mass index, smoking status, outpatient blood pressure, baseline comorbidities, and outpatient medication use were adjusted.

Figure S1. Study Cohort.

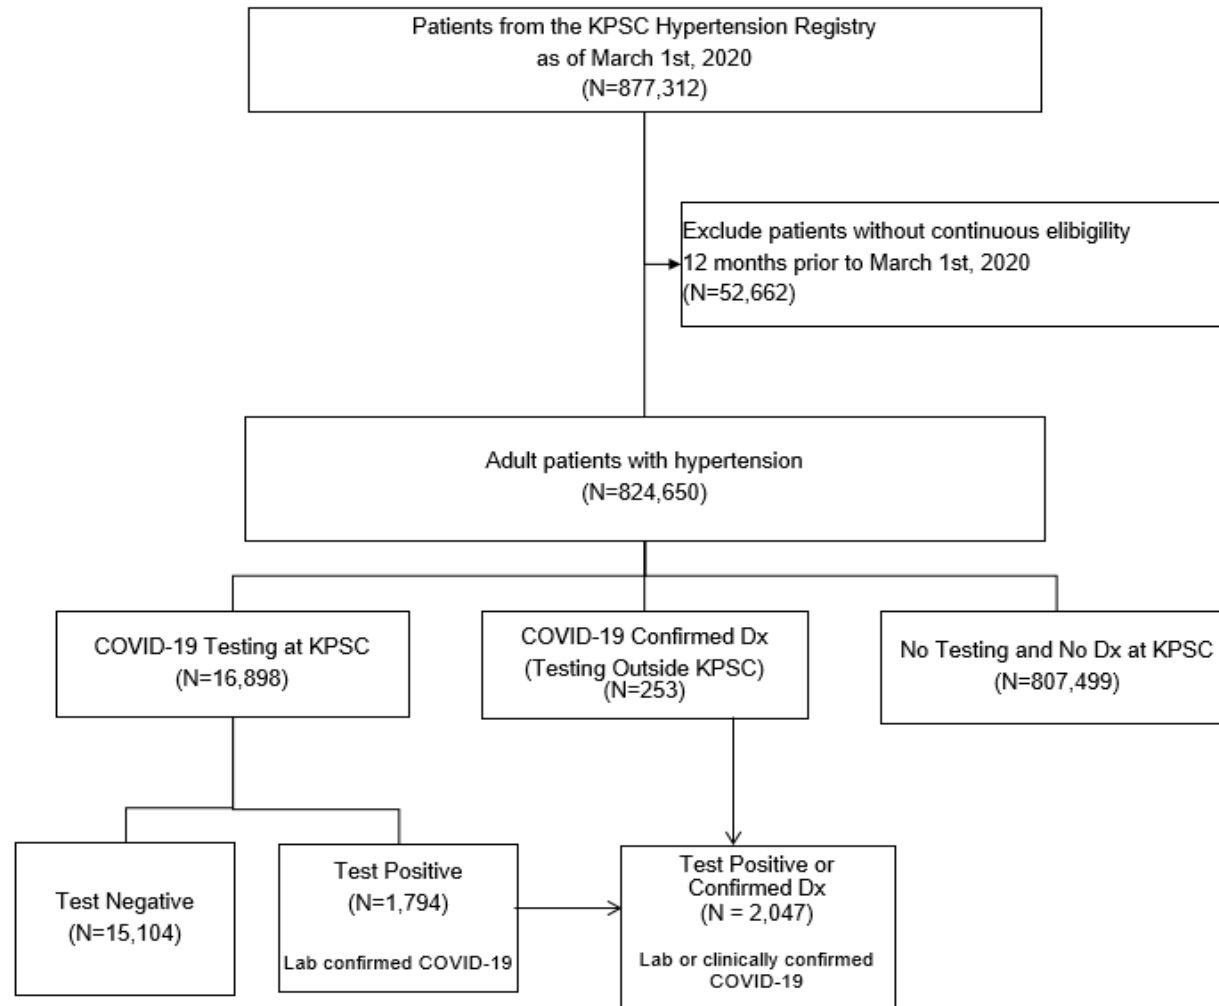

KPSC = Kaiser Permanente Southern California; Dx = diagnosis; COVID-19 Testing period = March 1-May 6, 2020; Test positive = Ever positive results

**Figure S2. Propensity Score Distribution.**

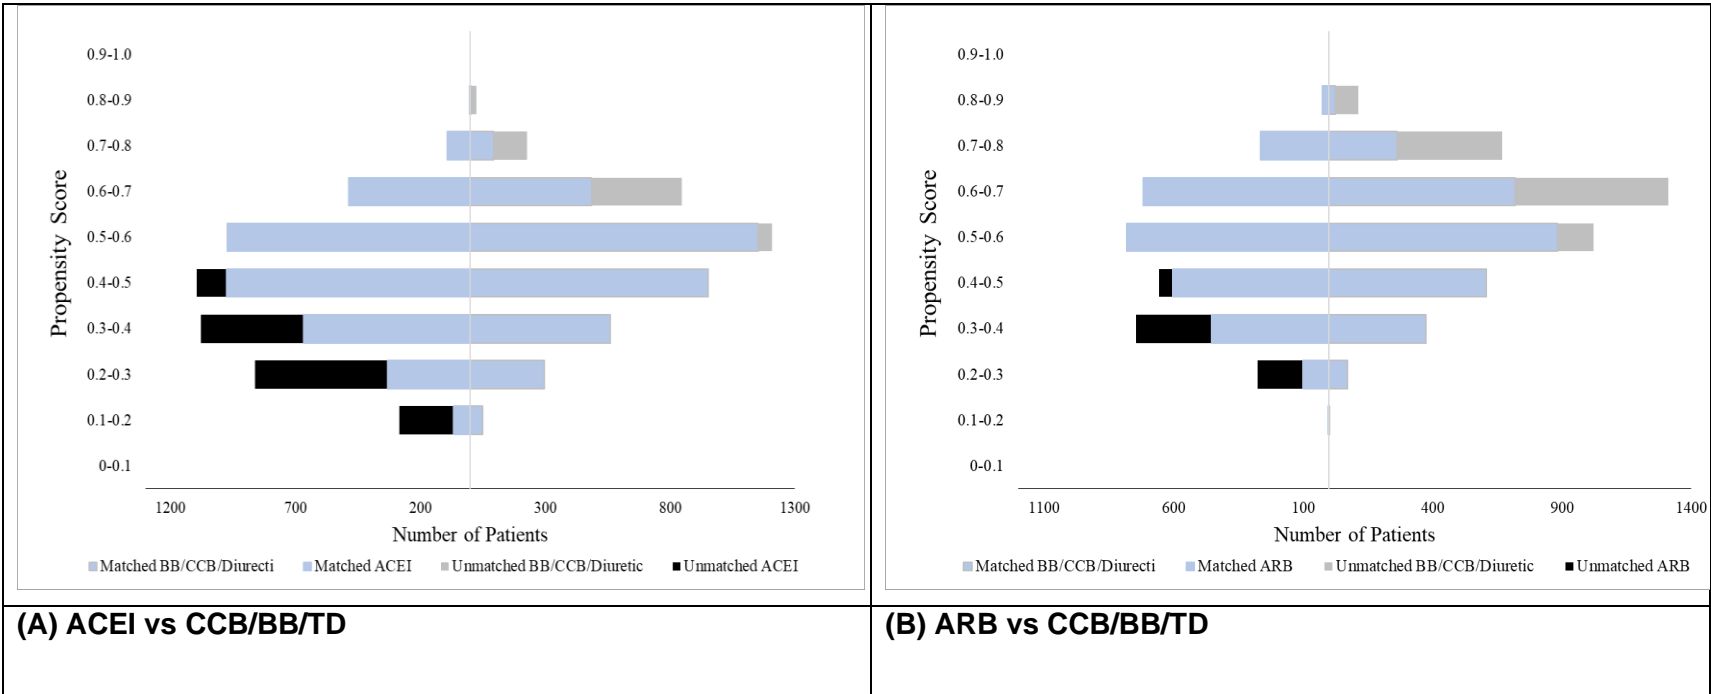

**(A) ACEI vs CCB/BB/TD**

**(B) ARB vs CCB/BB/TD**

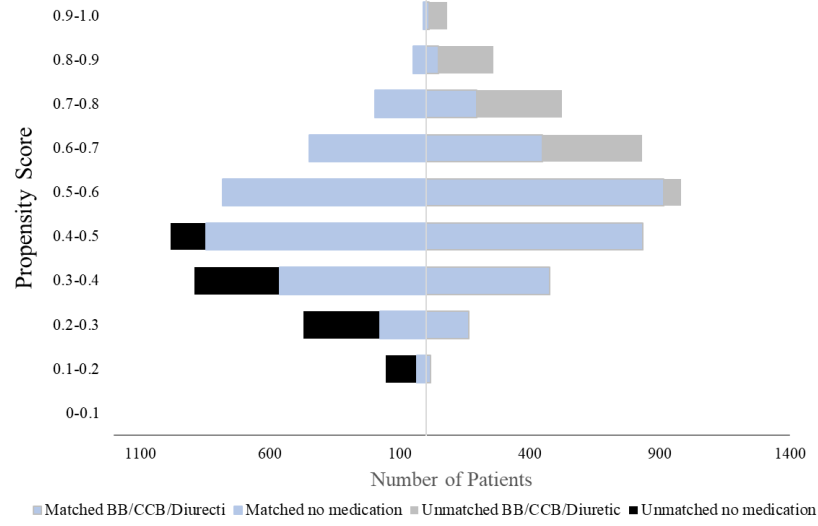

**(C) No antihypertensive medication vs CCB/BB/TD**

**Figure S3. Standardized Mean Difference Comparison Before and After Propensity Score Matching among Patients Taking ACEI or BB/CCB/TD.**

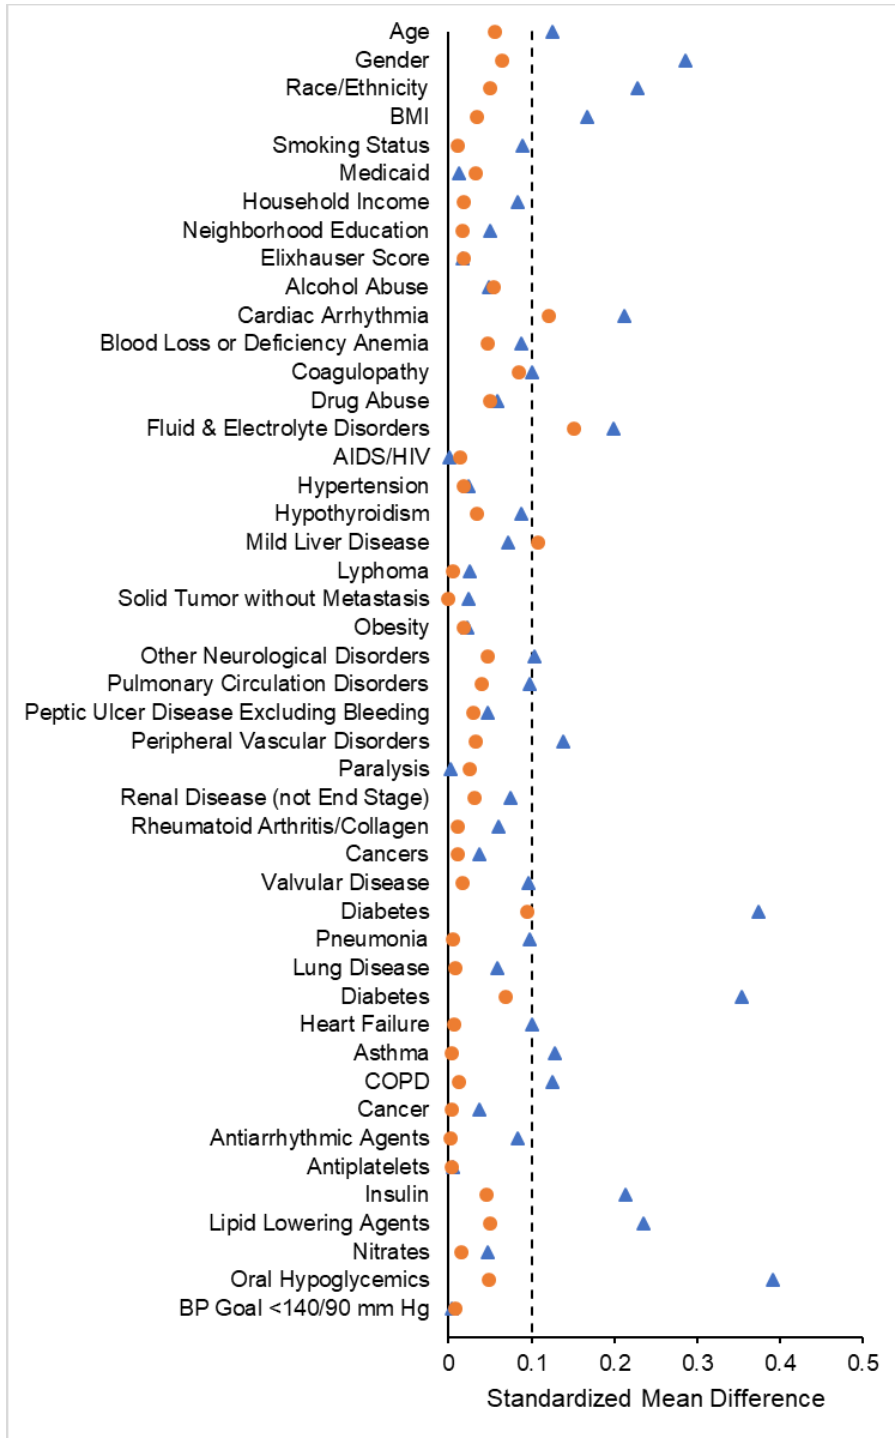

Blue triangle represents standardized mean difference (SMD) before matching, and orange circle represents SMD after matching. Hypertension refers to  $\geq 1$  outpatient visits with hypertension diagnosis codes.

**Figure S4. Standardized Mean Difference Comparison Before and After Propensity Score Matching among Patients Taking ARB or BB/CCB/TD.**

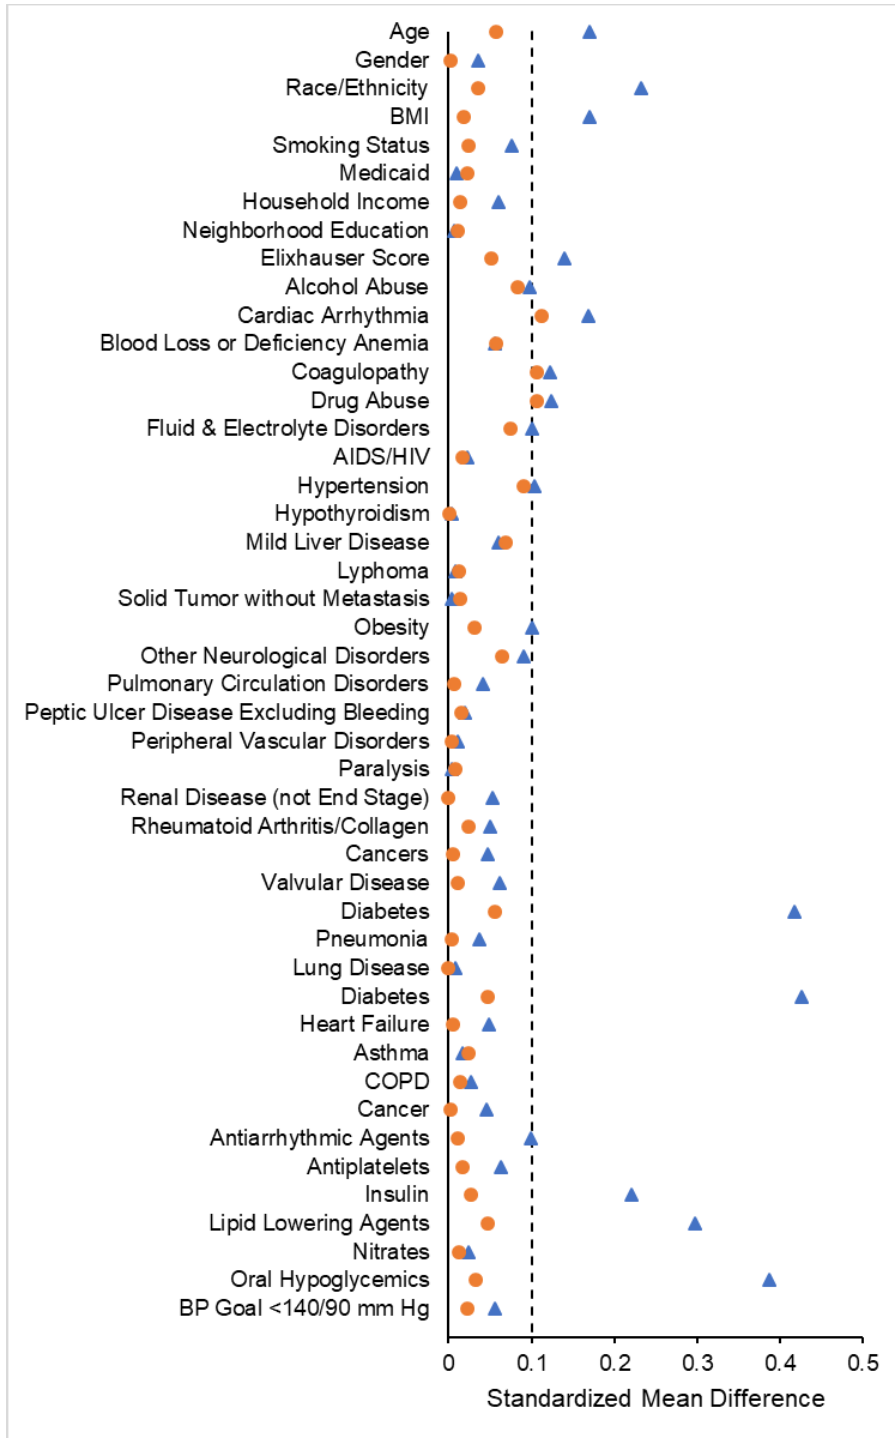

Blue triangle represents standardized mean difference (SMD) before matching, and orange circle represents SMD after matching. Hypertension refers to  $\geq 1$  outpatient visits with hypertension diagnosis codes.



**Figure S5. Standardized Mean Difference Comparison Before and After Propensity Score Matching among Patients Not Taking Antihypertensive Medications or Taking BB/CCB/TD.**

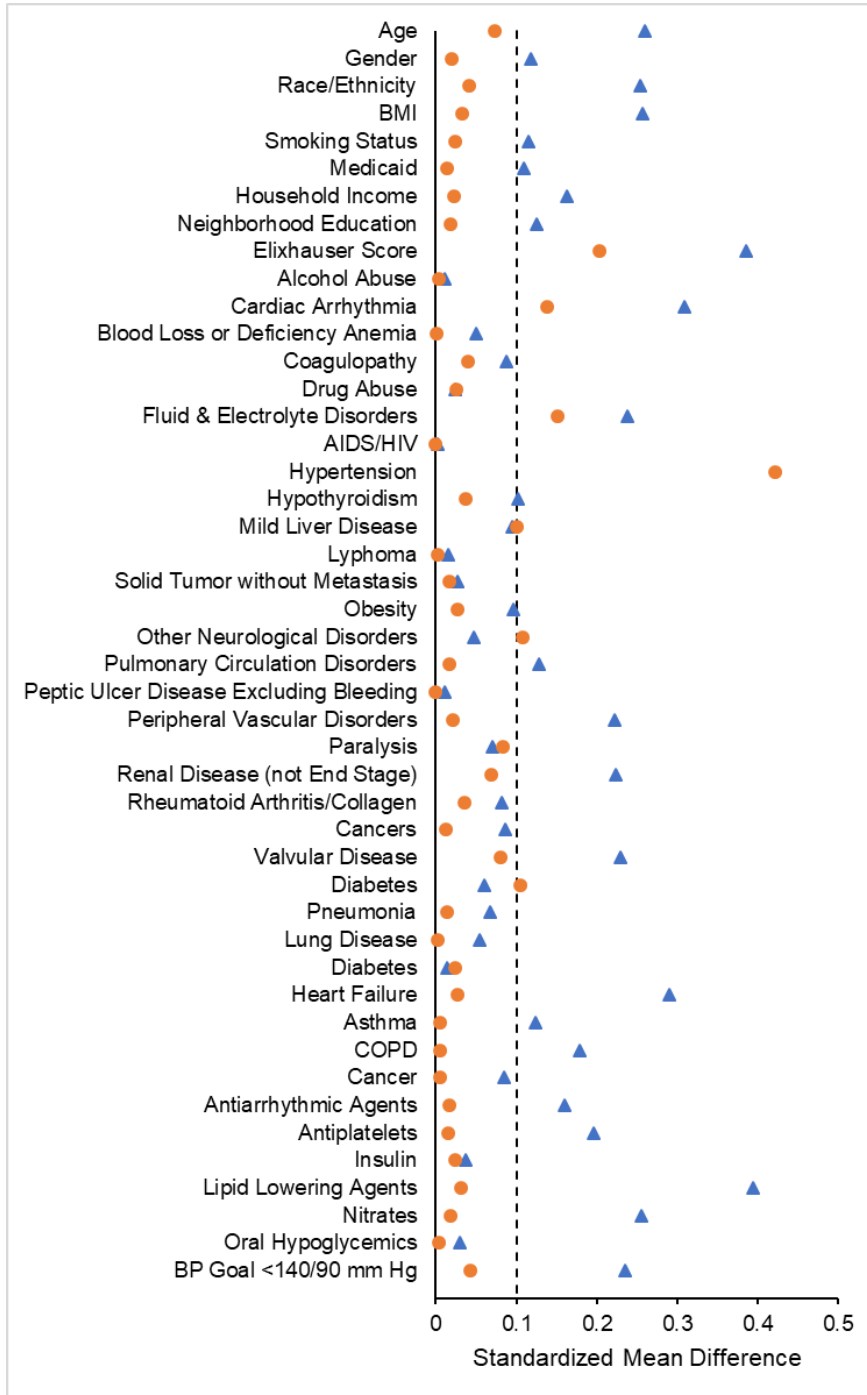

Blue triangle represents standardized mean difference (SMD) before matching, and orange circle represents SMD after matching. Hypertension refers to  $\geq 1$  outpatient visits with hypertension diagnosis codes.
